1     **Differential phase partition of a PICS complex is required for piRNA processing**  
2                     **and chromosome segregation in *C. elegans***

3  
4     Chenming Zeng<sup>†1</sup>, Chenchun Weng<sup>†1</sup>, Xiaoyang Wang<sup>†1</sup>, Yong-Hong Yan<sup>†2</sup>,  
5     Wen-Jun Li<sup>2</sup>, Demin Xu<sup>1</sup>, Minjie Hong<sup>1</sup>, Shanhui Liao<sup>1</sup>, Xuezhu Feng<sup>1</sup>, Meng-Qiu  
6     Dong<sup>2</sup>, Chao Xu<sup>\*1</sup>, and Shouhong Guang<sup>\*1,3</sup>

7  
8     <sup>1</sup>Hefei National Laboratory for Physical Sciences at the Microscale, School of Life  
9     Sciences, University of Science and Technology of China, Hefei, Anhui 230027, P.R.  
10    China

11    <sup>2</sup>National Institute of Biological Sciences, Beijing 102206, China.

12    <sup>3</sup>CAS Center for Excellence in Molecular Cell Science, Chinese Academy of Sciences,  
13    Hefei, Anhui 230027, P.R. China

14  
15  
16  
17    <sup>†</sup>These authors contributed equally to this work.

18    <sup>\*</sup>To whom correspondence should be addressed. E-mail: xuchaor@ustc.edu.cn and  
19    sguang@ustc.edu.cn.

20  
21  
22    Running title: PICS complex promotes piRNA biogenesis and chromosome  
23    segregation

24  
25    Keywords: piRNA, TOFU-6, PID-1, TOST-1, PICS-1, ERH-2, chromosome  
26    segregation, perinuclear granule

27  
28  
29

# **Abstract:**

Piwi-interacting RNAs (piRNAs) play significant roles in suppressing transposons and non-self nucleic acids, maintaining genome integrity, defending against viral infections, and are essential for fertility in a variety of organisms. In *C. elegans*, most piRNA precursors are transcribed by RNA polymerase II in the nucleus and are subjected to a number of processing and maturation steps. However, the biogenesis of piRNAs are still not fully understood. We used functional proteomics to study piRNA biogenesis in *C. elegans* and identified a PICS complex that is required for piRNA processing and chromosome segregation. The PICS complex contains two known piRNA biogenesis factors TOFU-6 and PID-1, and three new proteins PICS-1, TOST-1, and ERH-2, which exhibit dynamic localization among different subcellular compartments. In the germline of gravid animals, the PICS complex contains TOFU-6/PICS-1/ERH-2/PID-1 and largely concentrate at the perinuclear granule zone and engages in piRNA processing. During early embryogenesis, the TOFU-6/PICS-1/ERH-2/TOST-1 complex accumulates in the nucleus and play essential roles in chromosome segregation and cell division. Interestingly, the function of these factors in mediating chromosome segregation is independent of piRNA production. Therefore, we speculate that a differential phase partition of PICS factors may help cells to coordinate distinct cellular processes.

## Introduction:

Piwi-interacting RNAs (piRNAs) are a class of small (21–30 bp) RNAs that associate with Piwi, a member of the highly conserved Argonaute/Piwi protein family, and play significant roles in fertility and genome stability (reviewed by <sup>1,2</sup>). In *C. elegans*, piRNAs protect genome integrity in the germ line by recognizing and silencing non-self sequences such as transposons or other foreign nucleic acids, and induce chromatin modifications and neuron regeneration <sup>3-10</sup>.

In *C. elegans*, piRNA precursors are transcribed from thousands of genomic loci in germline, mainly including two large genome clusters on chromosome IV <sup>11,12</sup>. The upstream sequence transcription complex (USTC), containing PRDE-1, SNPC-4, TOFU-4, and TOFU-5, has been identified to bind the Ruby motif and drive the expression of piRNA precursors <sup>13</sup>. Precursors are decapped at 5'-ends to remove the first two nucleotides and trimmed at 3'-ends to remove extra-nucleotides, and generate mature piRNAs <sup>11,14-16</sup>. PARN-1, a conserved exonuclease present in germline P-granules, is required for 3'-end processing of piRNA precursors <sup>16</sup>. Additionally, PID-1 and TOFU-1/2/6/7 have been found to be essential for 5'-end and 3'-end processing of piRNA precursors by forward and reverse genetic screens <sup>15,17</sup>. Since most mature piRNAs are 21 nt in length and start with 5'-monophosphorylated uracil, piRNAs are also termed as 21U-RNAs in *C. elegans* <sup>8,11,18-20</sup>. The term 21U-RNA is used thereafter.

21U-RNAs scan for foreign sequences, while allowing mismatched pairing with the targeted mRNAs <sup>7-9,21-23</sup>. Upon targeting, the 21U-RNA/PRG-1 complex recruits RNA-dependent RNA polymerase (RdRP) to elicit the generation of secondary small interfering RNAs (siRNAs) to conduct subsequent gene silencing processes <sup>6-9,21</sup>.

However, the mechanism of how 21U-RNA precursors are processed to generate mature 21U-RNAs remains elusive. Here, using functional proteomics, we identified a piRNA and chromosome segregation (PICS) complex that is required for piRNA

processing, faithful chromosome segregation and cell division. The components of the PICS complex, TOFU-6, PICS-1, ERH-2, PID-1 and TOST-1, exhibit dynamic localization among different subcellular compartments. We propose that a differential phase partition of PICS factors may help cells to coordinate distinct cellular processes.

## Results:

### **TOFU-6 is required for piRNA biogenesis, chromosome segregation and cell division.**

A previous genome-wide RNAi screen identified seven Twenty-One-u Fouled Ups (TOFUs) that are engaged in distinct expression and processing steps of 21U-RNAs<sup>17</sup>. Recently, we found that TOFU-4/5, PRDE-1 and SNPC-4 form an upstream sequence transcription complex (USTC) to promote the transcription of 21U-RNA precursors<sup>13</sup>. To further understand the mechanism and roles of other TOFUs in 21U-RNA generation, we constructed GFP-3xFLAG tagged TOFU-1/2/6 transgenes (abbreviated as TOFU::GFP) using Mos1-mediated single-copy insertion (MosSCI) technology<sup>24</sup>. Among them, TOFU-1/2 are expressed in the germline cytoplasm (Fig. S1A). TOFU-6::GFP is present not only in the germline cytoplasm but also at distinct perinuclear foci in the germline, which largely co-localized with the P-granule marker PGL-1 (Figs. 1A and S1B). TOFU-6 does not form granules in oocytes and embryos, which was different from PRG-1 and PGL-1 (Figs. S1B and S1C)<sup>19</sup>. The TOFU-6::GFP transgene rescued the sterile phenotype of *tofu-6(ust96)*, suggesting that the transgene recapitulates the functions of the endogenous TOFU-6 protein (Fig. S1D).

We focused on TOFU-6 and obtained two balanced mutants, *tofu-6(it20)* and *tofu-6(yt2)*, from Caenorhabditis Genetics Center (Fig. 1B). To facilitate genotyping and genetic manipulation of *tofu-6*, we further generated two additional deletion alleles, *ust94* and *ust95*, by dual-sgRNA-mediated CRISPR/Cas9 technology in the



120 *+/mIn1* balancer background<sup>25</sup>. The *ust94* caused a 107 amino acids deletion and  
 121 frame shift, which is likely a null allele. The *ust95* caused an in-frame deletion. We  
 122 collected about 1000 homozygous *tofu-6* mutant worms of each allele, and deep  
 123 sequenced 18-30 nt sized small RNAs. 21U-RNAs are dramatically depleted in the  
 124 *tofu-6* null mutants (Figs. 1C and S2A), which is consistent with previous results of  
 125 *tofu-6* RNAi<sup>17</sup>. In *tofu-6(ust95)* mutants, the amount of 21U-RNAs was reduced to  
 126 roughly half of control animals. The *tofu-6(ust94)* is used as the reference allele in  
 127 this work.

128

129 We then assayed the brood size of *tofu-6* mutants. *prg-1*, *pid-1*, *parn-1* and *tofu-4*  
 130 mutants all have progeny although these genes are essential for 21U-RNA production  
 131 (Fig. 1D)<sup>15-17</sup>. Interestingly, the *it20*, *yt2*, and *ust94* alleles of *tofu-6* mutants are  
 132 sterile while the *tofu-6(ust95)* mutant still has a brood size similar to wild type  
 133 animals, suggesting that TOFU-6 has additional roles other than promoting 21U-RNA  
 134 biogenesis and *tofu-6(ust95)* is defective in a part of the functions (Fig. 1D). TOFU-6  
 135 is required for the expression of PRG-1. In *tofu-6(ust94)* and *tofu-6(ust95)* mutants,  
 136 the expression levels of GFP::PRG-1 were reduced (Fig S2B).

137

138 *tofu-6* mutant was previously reported with a maternal-effect lethal phenotype  
 139 and was therefore named as *mel-47*<sup>26</sup>. We used H2B::GFP as a chromatin marker and  
 140 observed a pronounced chromosome lagging phenomenon in *tofu-6(ust94)*, but not in  
 141 *tofu-6(ust95)* mutant, in early embryos (Fig. 1E). Additionally, in meta-telophase, the  
 142 two daughter nuclei of *tofu-6(ust94)* were not separated completely, adopting the  
 143 shape of a raindrop and with bridges between the two daughter cell nuclei (Fig. 1F).

144

145 We conclude that TOFU-6 may have dual roles in promoting piRNA biogenesis  
 146 and chromosome segregation.

147

#### 148 **Identification of TOFU-6 binding proteins by functional proteomics.**

149 We searched for proteins that interact with TOFU-6. First, we used

co-immunoprecipitation followed by mass spectrometry (IP-MS) to identify candidate proteins that interact with TOFU-6 (Table S1). Next, we examined whether the identified candidates are required for the subcellular localization of TOFU-6 by feeding worms with bacteria expressing dsRNA targeting these genes. The genes that are required for the perinuclear granule localization of TOFU-6 are listed in Fig. 2A. Among them, PID-1, which functions to promote piRNA processing, was identified<sup>15</sup>. In addition, we identified three new genes required for the perinuclear granule localization of TOFU-6. C35D10.13 was named as TOST-1 for twenty-one u antagonist-1 (see Rodrigues and Ketting, submitted in parallel). Y23H5A.3 and F35G12.11 were named as PICS-1 (required for piRNA biogenesis and chromosome segregation-1, see below) and ERH-2 (enhancer of rudimentary homolog-2), respectively.

When *pid-1* and *pics-1* were depleted by RNAi, TOFU-6 failed to form perinuclear granules, but the P-granule marker PGL-1 remained intact (Fig. 2B). We generated a deletion allele of *pid-1(ust64)* by dual sgRNA-mediated CRISPR/Cas9 technology and also obtained a balanced strain *pics-1(tm2417/hT2)* from National BioResource Project (NBRP) (Fig. S3A). In *pid-1(ust64)* and *pics-1(tm2417)* mutants, TOFU-6 failed to form perinuclear granules as well (Fig. 2C). The depletion of several known piRNA biogenesis factors, including *tofu-1/2/4*, *prg-1* and *parn-1*, did not prevent TOFU-6 from forming perinuclear foci (Fig. 2C). However, when *tost-1* and *erh-2* were depleted by RNAi, the TOFU-6::GFP foci became bigger and brighter and exhibited mislocalization from the perinuclear granule zone (Fig. 2D). The protein levels of TOFU-6::GFP remained unchanged after RNAi *tost-1* and *erh-2* (Fig. 2E). Interestingly, in *pid-1(ust64)*, the TOFU-6 foci disassembled in meiosis region, while in *pics-1(tm2417)*, the TOFU-6 foci disassembled in both mitotic and meiosis regions (Fig. S3B).

## TOFU-6, PID-1 and PICS-1 are required for piRNA maturation

To investigate the roles of PID-1 and PICS-1 in piRNA biogenesis, we deep

sequenced 18-30 nt sized small RNAs in *pid-1(ust64)* and *pics-1(tm2417)* mutants, respectively, from late-young adult worms and treated by Tobacco Decapping plus2 enzyme to remove 5'-end cap structure. 21U-RNA precursors mostly start 2 nt upstream of the 5' end of mature 21U-RNAs and are capped with an m<sup>7</sup>G<sup>11</sup>. Removal of 5'-end cap will facilitate the sequencing of 21U-RNA precursors. Like *tofu-6* mutants, in *pid-1* and *pics-1* mutants, the mature 21U-RNA levels were significantly reduced (Figs. 3A, S4A and S4B). In addition, in *tofu-6*, *pid-1* and *pics-1* mutants, 21U-RNA precursors were accumulated with 2 nt upstream of the 5' end and additional nucleotides downstream of the 3' end of mature 21U-RNAs, comparing to those of wild type animals (Fig. 3B). We conclude that TOFU-6, PID-1 and PICS-1 are involved in the processing of 21U-RNA precursors.

We then constructed single copy GFP::3xFLAG tagged PID-1 and PICS-1 transgenes (abbreviated as PID-1::GFP and PICS-1::GFP, respectively) (Figs. S4C and S4D). The PICS-1::GFP transgene rescued the sterile phenotype of *pics-1(tm2417)* (Fig. S4E). PID-1 mainly localized in germline nuage and largely co-localized with PGL-1 as well (Fig. 3C). The expression pattern of PICS-1 was similar to that of TOFU-6, which accumulates in both germline cytoplasm and perinuclear nuage and largely overlaps with the P-granule marker PGL-1 (Fig. 3D). RNAi knocking down *tost-1* and *erh-2* induced bigger and brighter PICS-2 granules which are mislocalized from the perinuclear granule zone (Figs. S5A and S5B), similar to TOFU-6 granules after the depletion of *tost-1* and *erh-2*.

Strikingly, PICS-1::GFP and PID-1::GFP failed to form peri-nuclear granules but accumulated in the nucleus upon *tofu-6* RNAi, suggesting that PICS-1 and PID-1 may shuttle between the cytoplasm and the nucleus in the germline (Figs. 3E-F). The translocation of PICS-1 to nucleus depends on PID-1, since PICS-1::GFP failed to form perinuclear foci in meiosis region in the absence of *pid-1* (Fig. S5C) and failed to accumulate in the nucleus in *tofu-6(ust94);pid-1(RNAi)* mutants (Fig. S5D). These results are consistent with the previous report that PID-1 has both a bipartite nuclear

210 localization signal and a nuclear export signal<sup>15</sup>.

211

# 212 **TOFU-6, PICS-1, ERH-2, PID-1 and TOST-1 form protein complexes.**

213 To further test whether these novel factors and TOFU-6 form a protein complex,  
214 we generated single copy GFP-3xFLAG tagged TOST-1 and ERH-2 transgenes  
215 (abbreviated as TOST-1::GFP and ERH-2::GFP, respectively) (Figs. S6A and S6B).  
216 TOST-1 mainly accumulated in the cytosol of the germline syncytium, but not  
217 significantly gathered in the perinuclear granules (Fig. 4A). ERH-2 exhibits a  
218 perinuclear granule localization similar to that of TOFU-6, and largely co-localized  
219 with the PGL-1 marker as well (Fig. 4B). In the absence of *tost-1*, ERH-2 forms  
220 bigger and brighter granules yet the protein levels unaltered (Figs. S6C and S6D).  
221 Interestingly, the expression levels of TOST-1 were strongly reduced in germline and  
222 embryos but not in oocyte in the absence of *pics-1* and *erh-2* (Figs. S6E and see  
223 below Figs. 6C, S7A and S7B). Besides, ERH-2 failed to form perinuclear granules  
224 but accumulated in the nucleus when *tofu-6* and *pics-1* were depleted by RNAi (Fig.  
225 S6F).

226

227 We assayed the protein-protein interactions of these proteins *in vitro*. HA-His- or  
228 GST-tagged TOFU-6, PICS-1, ERH-2, PID-1 and TOST-1 proteins were expressed in  
229 *E. Coli* and purified. Then the proteins were mixed together and pulled down by GST  
230 beads. After extensive elution, the associated proteins are eluted and detected by  
231 western blot with anti-HA antibody (Figs. 4C-F). Meanwhile, we investigated the *in*  
232 *vivo* protein-protein interaction by immunoprecipitating 3xFLAG-GFP-tagged  
233 TOST-1, PICS-1 and ERH-2 and subjected the associated proteins by mass  
234 spectrometry (Table S1 and summarized in Figs. 4G and S7). Combining both *in vitro*  
235 and *in vivo* binding data, we concluded that TOFU-6, PICS-1, ERH-2, PID-1 and  
236 TOST-1 can form protein complexes in *C. elegans*.

237

238 Notably, although TOFU-6, PICS-1, ERH-2 and PID-1 largely co-localized with  
239 P-granules, depletion of these genes only affects the granule formation of each other

(Fig. 2B), but not the formation of P-granules, as indicated by the marker PGL-1. This result suggests that the PICS factors compose distinct perinuclear granules other than P-granules per se.

# **TOFU-6, PICS-1, ERH-2 and TOST-1 promote chromosome segregation and cell division.**

We tested whether PID-1, PICS-1, ERH-2 and TOST-1 are required for chromosome segregation and cell division, as TOFU-6 does. Using a GFP::H2B transgene, we found that TOFU-6, PICS-1, ERH-2 and TOST-1, but not PRG-1 and PID-1, are required for chromosome segregation and cell division in early embryos (Figs. 5A-C). In the absence of *tofu-6*, *pics-1*, *erh-2* and *tost-1*, but not *pid-1* and *prg-1*, we observed chromosome lagging and cell bridging phenotypes. Since PRG-1 and PID-1 are both essential for 21U-RNA production, we conclude that TOFU-6, PICS-1 and ERH-2-involved chromosome segregation and cell division processes are independent of piRNA generation. Consistently, although *pid-1* and *prg-1* mutants had viable progeny, *tofu-6* and *pics-1* were sterile (Figs. 1D and S4E). In addition, PRG-1 and PID are not expressed in oocyte and early embryos (Figs. S1B and S4D), which are different to TOFU-6 and PICS-1.

Next, we investigated whether TOFU-6, PICS-1, ERH-2 and TOST-1 can accumulate in the nucleus. During early embryogenesis, TOFU-6, PICS-1, ERH-2 and TOST-1 enter the nucleus at the prophase of cell division, yet maintain in the cytosol at interphase without foci formation, in the 2- and 4-cell embryos (Figs. 6A and 6B). The subcellular localization of PICS factors exhibited a mutually dependent manner (Fig. 6C). For example, in all cells of early embryos, TOST-1 accumulates in the nucleus in the absence of *tofu-6*, *pics-1* and *erh-2*. ERH-2 accumulates in the nucleus in the absence of *tofu-6* and *pics-1*. PICS-1 accumulates in the nucleus in the absence of *tofu-6*. Similar nuclear accumulation of TOFU-6, PICS-1, ERH-2 and TOST-1 were observed in later embryos and oocytes (Figs. S8A and S8B).

270 We conclude that TOFU-6, PICS-1, ERH-2 and TOST-1 can accumulate in the  
271 nucleus to engage in chromosome segregation and cell division processes, which is  
272 independent of piRNA biogenesis.

273

#### 274 **Identification of IFE-3 as an additional factor required for TOFU-6 binding.**

275 To further understand the mechanism of PICS complex in mediating 21U-RNA  
276 maturation, we identified IFE-3 from the IP-MS assays of TOFU-6, PICS-1, TOST-1  
277 and ERH-2 (Fig. S7). IFE-3 encodes one of the five *C. elegans* homologs of the  
278 mRNA cap-binding protein eIF4E, which is therefore predicted to bind capped RNAs  
279 and likely 21U-RNA precursors. *In vitro* GST pull-down assay further confirmed a  
280 direct protein-protein interaction between TOFU-6 and IFE-3 (Fig. 7A). IFE-3 largely  
281 co-localized with the P-granule marker PGL-1 in germline as well (Fig. 7B). However,  
282 the depletion of *ife-3* does not change the perinuclear localization and nuclear  
283 accumulation of TOFU-6, PICS-1, ERH-2 and TOST-1 in germlines and embryos,  
284 respectively, and vice versa (data not shown).

285

286

#### 287 **Discussion:**

288 Here, by a series of proteomics and imaging experiments, we demonstrate that in  
289 the germline four proteins TOFU-6, PICS-1, ERH-2 and PID-1 might function as a  
290 complex and promote the maturation of 21U-RNAs (Fig. 7C). In embryos, TOFU-6,  
291 PICS-1, ERH-2 and TOST-1 might form another complex and accumulate in the  
292 nucleus to engage in chromosome segregation and cell division. These factors exhibit  
293 a dynamic localization among different subcellular compartments at different  
294 developmental stages. We speculate that a differential phase partition of these PICS  
295 factors may help cells to coordinate distinct cellular processes.

296

#### 297 **PICS-1 is required for piRNA biogenesis.**

298 Previously, forward genetic screens have identified PRDE-1 and PID-1 as  
299 essential factors for piRNA biogenesis in *C. elegans* (Weick et al. 2014; de

Albuquerque et al. 2014). Later, a genome-wide RNAi screening identified TOFU genes that are engaged in expression and distinct processing steps of 21U-RNAs (Goh et al. 2014). We recently found that TOFU-4/5, PRDE-1 and SNPC-4 form a USTC complex that associate with the upstream sequence element to promote the transcription of 21U-RNA precursors<sup>13</sup>. Here, we combined a series of functional proteomic methods and characterized a PICS complex containing TOFU-6, PICS-1, ERH-2, and PID-1 in the germline. We further used cell biology approaches and demonstrated a mutual dependency of the components of the PICS complex to form perinuclear granules. Using deep sequencing technology, we found that 21U-RNA levels were reduced and the precursors accumulated, which suggests that the TOFU-6, PICS-1 and PID-1 proteins are engaged in the 21U-RNA maturation. However, it is unclear of the biochemical characteristics of each component of this complex. PARN-1 is a conserved exonuclease, expresses in germline P-granules, and is required for 3'-end processing of 21U-RNAs<sup>16</sup>. We did not identify PARN-1 from our IP-MS experiments, suggesting that PARN-1 and PICS complex may act independent of each other to promote 21U-RNA maturation, for instance, the PICS complex may act to perform 5' trimming of 21U-RNA precursors. Alternatively, their interaction is very transient to be captured by IP-MS experiments. Interestingly, we identified IFE-3 bound to TOFU-6, PICS-1, ERH-2 and TOST-1 from the IP-MS assay. IFE-3 binds to 5'-capped RNAs. Whether IFE-3 binds to 5'-capped 21U-RNA precursors and is involved in the maturation of 21U-RNAs requires further investigation (see Rodrigues and Ketting, submitted in parallel).

### **TOFU-6, PICS-1, ERH-2 and TOST-1 engage in chromosome segregation and cell division.**

Strikingly, we found that *tofu-6*, *pics-1*, *erh-2* and *tost-1* mutants exhibit abnormal chromosome segregation and cell division during embryogenesis. These defects are independent of the presence of 21U-RNAs, since similar defects are not observed in *prg-1* and *pid-1* mutants. We speculate that TOFU-6, PICS-1, ERH-2 and TOST-1 may have direct roles in mediating chromosome segregation. In early embryos,



330 TOFU-6, PICS-1, ERH-2 and TOST-1, but not PRG-1 and PID-1, could accumulate  
331 in the nucleus in mutually dependent manners.

332

333 The mechanism of how TOFU-6, PICS-1, ERH-2 and TOST-1 promote  
334 chromosome segregation is unclear. ERH (enhancer of rudimentary), the human  
335 ortholog of ERH-2, has been shown to cooperates with conserved RNA-processing  
336 factors to promote meiotic mRNA decay and facultative heterochromatin assembly,  
337 affect the replication stress response through regulation of RNA processing, and  
338 control CENP-E mRNA splicing <sup>27-29</sup>. Whether TOFU-6, PICS-1 and TOST-1 act  
339 through ERH-2 to engage in chromosome segregation requires further investigation.  
340 Especially, both TOFU-6 and PICS-1 have RNA binding domains. It will be also  
341 interesting to identify the RNAs that bind to the PICS complex.

342

#### 343 **A differential phase partition of TOFU-6, PICS-1, ERH-2, PID-1 and TOST-1** 344 **between distinct subcellular compartments.**

345 Cells organize many of their biochemical reactions in non-membrane  
346 compartments, in which proteins and nucleic acids are concentrated. Recent evidence  
347 show that many of these compartments are liquids that form by phase separation from  
348 the cytoplasm, including many PZM-granule factors in *C. elegans* <sup>30</sup>. These  
349 condensates are involved in diverse processes, including RNA metabolism, ribosome  
350 biogenesis, the DNA damage response and signal transduction <sup>31</sup>. We show here that  
351 certain piRNA processing factors, including TOFU-6, PICS-1 and ERH-2 localize to  
352 the perinuclear condensate which we named the PICS granules. We found that these  
353 factors were distributed in the cytoplasm, the perinuclear nuage, and the nucleus in  
354 mutually dependent manners. Moreover, the PICS granules exhibit a spatiotemporal  
355 distribution at distinct developmental stages. While they assembled as perinuclear  
356 nuage in the adult germline, they disassembled in oocytes and early embryos. We  
357 speculate that the differential phase partition of this liquid-like condensates in  
358 different subcellular compartments helps to organize and coordinate distinct cellular  
359 processes, including piRNA biogenesis, chromosome segregation and cell division.



360 Whether other gene regulatory or biochemical pathways can be organized and  
361 coordinated in similar ways needs further investigation.

362

363 In adult germ cells, PZM granules contain ordered tri-condensate assemblages  
364 with Z granules, P granules and Mutator foci<sup>30</sup>. Here, we identified PICS granules  
365 largely co-localized with the P-granule marker PGL-1. We speculate that there are a  
366 number of distinct liquid droplet organelles localized in the perinuclear granule zone  
367 (PGZ), ordered in a temporal and spatial fashion, and therefore organizing and  
368 coordinating the complex RNA processing pathways that underlie gene-regulatory  
369 systems. These liquid droplet organelles may exchange their protein and RNA  
370 components with each other and other nuclear and cytoplasmic compartments. With  
371 emerging high resolution imaging technologies, it will be great to dissect the  
372 compositions, dynamics and biological roles of this perinuclear granule zone.

373

374

375

376

## 377 **Materials and methods**

378

379 **Strains.** Bristol strain N2 was used as the standard wild type strain. All strains were  
380 grown at 20°C unless specified. The strains used in this study were listed in  
381 Supplementary Table S2.

382

383 **Construction of transgenic mutant strains.** For TOFU-1::GFP, TOFU-2::GFP,  
384 TOFU-6::GFP, PID-1::GFP, PICS-1::GFP, TOST-1::GFP, endogenous promoter  
385 sequences, 3' UTR, ORFs, coding sequence of gfp::3xflag and a linker sequence  
386 (GGAGGTGGAGGTGGAGCT) (inserted between ORFs and gfp::3xflag) were fused  
387 and cloned into PCFJ151 vectors using ClonExpress® MultiS One Step Cloning Kit  
388 (Vazyme C113-02, Nanjing). These transgenes were integrated onto the *C. elegans*  
389 chromosome II by MosSCI technology.

390

391 For ERH-2::GFP, IFE-3::GFP and GFP::PRG-1, coding sequence of gfp::3xflag was  
392 inserted before stop code or after initiation code using CRISPR-Cas9 system. Repair  
393 templates contained homologue arms of 1000bp to 1500bp and were cloned into  
394 vector using ClonExpress® MultiS One Step Cloning Kit (Vazyme C113-02,  
395 Nanjing). Injection mix contains PDD162 (50 ng/μL), repair plasmid (50 ng/μL),  
396 pc fj90 or 90-gfp (20 ng/μL) and one or two gRNAs close to N-terminal or  
397 C-terminal of the genes (20 ng/μL). Mix was injected into young adult N2 animals.  
398 Two or three days later, F1 worms containing pc fj90 or 90-gfp marker were isolated.  
399 After growing at 20°C for another three days, animals were screening for GFP  
400 insertion by PCR.

401

402 For gene deletions, 3 or 4 sgRNAs were co-injected into N2 or +/-mIn-1 animals  
403 with PDD162 (50 ng/μL), 90-gfp (20 ng/μL), 10xTE buffer, DNA ladder (500 ng/μL).  
404 Two or three days later, F1 worms expressing 90-gfp marker were isolated. After  
405 growing at 20°C for another three days, animals were screened for deletion by PCR.

406

407 Primers used for molecular cloning and dual-sgRNA-directed  
408 CRISPR/Cas9-mediated gene deletion are listed in Supplementary Table S3.

409

410 **Immunoprecipitation followed by mass spectrometry analysis.** The mix-staged  
411 transgenic worms expressing TOFU-6::GFP, TOST-1::GFP, PICS-1::GFP, and  
412 ERH-2::GFP were resuspended in the same volume of 2x lysis buffer (50 mM  
413 Tris-HCl pH 8.0, 300 mM NaCl, 10% glycerol, 1% Triton-X100, Roche®cOmplete™  
414 EDTA-free Protease Inhibitor Cocktail, 10 mM NaF, 2 mM Na<sub>3</sub>VO<sub>4</sub>) and lysed in a  
415 FastPrep-24™ 5G Homogenizer. The supernatant of lysate was incubated with  
416 home-made anti-GFP beads for one hour at 4°C. The beads were then washed three  
417 times with cold lysis buffer. GFP immunoprecipitates were eluted by chilled elution  
418 buffer (100 mM Glycine-HCl pH 2.5). About 1/8 of the eluates were subjected to the  
419 western blotting analysis. The rest of the eluates were precipitated with TCA or cold

420 acetone and dissolved in 100 mM Tris, pH 8.5, 8 M urea. The proteins were reduced  
421 with TCEP, alkylated with IAA, and finally digested with trypsin at 37°C overnight.  
422 The LC-MS/MS analysis of the resulting peptides and the MS data processing  
423 approaches were conducted as previously described<sup>32</sup>.

424  
425 **RNAi.** RNAi experiments were conducted as previously described<sup>33</sup>. Images were  
426 collected using a Leica DM2500 microscope.

427  
428 **RNA isolation and sequencing.** Synchronized late young adult worms were  
429 sonicated in sonication buffer (20 mM Tris-HCl [pH 7.5], 200 mM NaCl, 2.5 mM  
430 MgCl<sub>2</sub>, and 0.5% NP40). The eluates were incubated with TRIzol reagent followed by  
431 isopropanol precipitation. The precipitated RNAs were treated with calf intestinal  
432 alkaline phosphatase (CIAP, Invitrogen), re-extracted with TRIzol, and treated with  
433 Tabacco Decapping plus 2 (Enzymax).

434  
435 Small RNAs were subjected to deep sequencing using an Illumina platform  
436 (Novogene Bioinformatics Technology Co., Ltd). Briefly, small RNAs ranging from  
437 18 to 30 nt were gel-purified and ligated to a 3' adaptor  
438 (5'-pUCGUAUGCCGUCUUCUGCUUGidT-3'; p, phosphate; idT, inverted  
439 deoxythymidine) and a 5' adaptor  
440 (5'-GUUCAGAGUUCUACAGUCCGACGAUC-3'). The ligation products were  
441 gel-purified, reverse transcribed, and amplified using Illumina's sRNA primer set  
442 (5'-CAAGCAGAAGACGGCATACGA-3'; 5'-AATGATACGGCGACCACCGA-3').  
443 The samples were then sequenced using an Illumina HiSeq platform.

444  
445 **Bioinformatics.** The Illumina-generated raw reads were first filtered to remove  
446 adaptors, low-quality tags and contaminants to obtain clean reads at Novogene. Clean  
447 reads ranging from 18 to 30 nt were mapped to the unmasked *C. elegans* genome and  
448 the transcriptome assembly WS243, respectively, using Bowtie2 with default  
449 parameters. The number of reads targeting each transcript was counted using custom

450 Perl scripts.

451

452 **Brood size.** Ten L3 worms were singled to fresh NGM plates and the number of  
453 progenies were scored.

454

455 **Protein expression and purification.** The GST-tagged proteins were cloned into the  
456 vector PGEX-4T-1 and HA-tagged proteins were cloned into the vector PET22b. All  
457 expression plasmids were transformed into *E. coli* Rosetta(DE3) and proteins were  
458 expressed at 16°C for 20 hours in the presence of 0.5 mM IPTG. The recombinant  
459 proteins, which contain a N-terminal GST-tag, were purified on a Glutathione  
460 sepharose (GE Healthcare). And the recombinant proteins, which contain a C-terminal  
461 HA-tag and 6 ×His tag, were purified on a Ni-NTA resin (GE Healthcare).

462

463 **GST pull-down.** Recombinant GST-fused proteins were incubated with Glutathione  
464 sepharose (GE Healthcare) in buffer (20 mM Tris, 200 mM NaCl, PH 7.5) for 40 min  
465 at 4°C. Then HA-tagged protein were added and incubated 40 min at 4°C. The resin  
466 was then washed three times with buffer (20 mM Tris, 200 mM NaCl, PH 7.5, 2 mM  
467 DTT, 0.1% NP-40). Finally, 50 mM glutathione was added and incubated 30 min to  
468 elute the protein. All GST pull down samples were loaded on SDS-PAGE and then  
469 transfer to Hybond-ECL membrane for western blotting.

470

471 **Western Blotting.** Proteins were resolved by SDS-PAGE on gradient gels (10%  
472 separation gel, 5% spacer gel) and transferred to Hybond-ECL membrane. After  
473 washing with TBST buffer (Sangon biotech, Shanghai) and blocking with 5%  
474 milk-TBST. The membrane was incubated at room temperature for two hours with  
475 antibodies (listed below). After 3x10min washes in TBST, the membrane was  
476 incubated at room temperature for additional two hours with secondary antibodies.  
477 The membrane was washed 3x10min in TBST and then visualized. Antibody  
478 concentrations for western blots were as follows: GFP (abcam ab290) 1:5000; β-actin  
479 (servicebio GB12001) 1:2000; His (proteintech 66006-1-Ig) 1:5000. anti-HA Ab and

480 Anti-mouse IgG (H+L) were purchased from Proteintech.

481

482 **Statistics.** Bar graphs with error bars were presented with mean and s.d. All of the  
483 experiments were conducted with independent *C. elegans* animals for an indicated N  
484 times. Statistical analysis was performed with the two-tailed Student's t-test.

485

486 **Data availability.** All related data and materials are available upon request.

487

488

489 **Acknowledgments.** We are grateful to Dr. Guangshuo Ou's lab for their technical  
490 supports and suggestions, and the members of the Guang lab for their comments. We  
491 are grateful to the International *C. elegans* Gene Knockout Consortium, and the  
492 National Bioresource Project for providing the strains. Some strains were provided by  
493 the CGC, which is funded by NIH Office of Research Infrastructure Programs (P40  
494 OD010440). This work was supported by grants from the Chinese Ministry of Science  
495 and Technology (2017YFA0102903), the National Natural Science Foundation of  
496 China (Nos. 81501329, 31671346, 91640110, 31870812 and 31871300), the  
497 Major/Innovative Program of Development Foundation of Hefei Center for Physical  
498 Science and Technology (2017FXZY005), and CAS Interdisciplinary Innovation  
499 Team.

500

501 **Author contributions**

502 C.Z. and S.G. designed the project; C.Z., C.W., X.W., Y.Y., W.L. D.X, M.H. S.L. and  
503 X.Z., performed research; C.Z., C.W. X.W. and Y.Y. contributed new reagents/analytic  
504 tools; C.Z. and C.W. analyzed data; C.Z. and S.G wrote the paper.

505

506 **Additional Information.** The authors declare no competing financial interests.

507

508

# References:

1. Weick, E.M. & Miska, E.A. piRNAs: from biogenesis to function. *Development* 141, 3458-71 (2014).
2. Watanabe, T. & Lin, H. Posttranscriptional regulation of gene expression by Piwi proteins and piRNAs. *Mol Cell* 56, 18-27 (2014).
3. Luteijn, M.J. & Ketting, R.F. PIWI-interacting RNAs: from generation to transgenerational epigenetics. *Nat Rev Genet* 14, 523-34 (2013).
4. Feng, X. & Guang, S. Small RNAs, RNAi and the inheritance of gene silencing in *Caenorhabditis elegans*. *J Genet Genomics* 40, 153-60 (2013).
5. Malone, C.D. & Hannon, G.J. Molecular evolution of piRNA and transposon control pathways in *Drosophila*. *Cold Spring Harb Symp Quant Biol* 74, 225-34 (2009).
6. Mao, H. et al. The Nrde Pathway Mediates Small-RNA-Directed Histone H3 Lysine 27 Trimethylation in *Caenorhabditis elegans*. *Curr Biol* 25, 2398-403 (2015).
7. Ashe, A. et al. piRNAs can trigger a multigenerational epigenetic memory in the germline of *C. elegans*. *Cell* 150, 88-99 (2012).
8. Bagijn, M.P. et al. Function, targets, and evolution of *Caenorhabditis elegans* piRNAs. *Science* 337, 574-8 (2012).
9. Shirayama, M. et al. piRNAs initiate an epigenetic memory of nonself RNA in the *C. elegans* germline. *Cell* 150, 65-77 (2012).
10. Kim, K.W. et al. A Neuronal piRNA Pathway Inhibits Axon Regeneration in *C. elegans*. *Neuron* 97, 511-519 e6 (2018).
11. Gu, W. et al. CapSeq and CIP-TAP identify Pol II start sites and reveal capped small RNAs as *C. elegans* piRNA precursors. *Cell* 151, 1488-500 (2012).
12. Weick, E.M. et al. PRDE-1 is a nuclear factor essential for the biogenesis of Ruby motif-dependent piRNAs in *C. elegans*. *Genes Dev* 28, 783-96 (2014).
13. Chenchun Weng et al. The USTC complex co-opts an ancient machinery to drive piRNA transcription in *C. elegans*. *bioRxiv* (2018).
14. Billi, A.C. et al. The *Caenorhabditis elegans* HEN1 ortholog, HENN-1, methylates and stabilizes select subclasses of germline small RNAs. *PLoS Genet* 8, e1002617 (2012).
15. de Albuquerque, B.F. et al. PID-1 is a novel factor that operates during 21U-RNA biogenesis in *Caenorhabditis elegans*. *Genes Dev* 28, 683-8 (2014).
16. Tang, W., Tu, S., Lee, H.C., Weng, Z. & Mello, C.C. The RNase PARN-1 Trims piRNA 3' Ends to Promote Transcriptome Surveillance in *C. elegans*. *Cell* 164, 974-84 (2016).
17. Goh, W.S. et al. A genome-wide RNAi screen identifies factors required for distinct stages of *C. elegans* piRNA biogenesis. *Genes Dev* 28, 797-807 (2014).
18. Ruby, J.G. et al. Large-scale sequencing reveals 21U-RNAs and additional microRNAs and endogenous siRNAs in *C. elegans*. *Cell* 127, 1193-207 (2006).
19. Batista, P.J. et al. PRG-1 and 21U-RNAs interact to form the piRNA complex required for fertility in *C. elegans*. *Mol Cell* 31, 67-78 (2008).
20. Das, P.P. et al. Piwi and piRNAs act upstream of an endogenous siRNA pathway to suppress Tc3 transposon mobility in the *Caenorhabditis elegans* germline. *Mol Cell* 31, 79-90 (2008).
21. Lee, H.C. et al. *C. elegans* piRNAs mediate the genome-wide surveillance of germline transcripts. *Cell* 150, 78-87 (2012).
22. Shen, E.Z. et al. Identification of piRNA Binding Sites Reveals the Argonaute Regulatory

553 Landscape of the *C. elegans* Germline. *Cell* 172, 937-951 e18 (2018).  
554 23. Zhang, D. et al. The piRNA targeting rules and the resistance to piRNA silencing in  
555 endogenous genes. *Science* 359, 587-592 (2018).  
556 24. Frokjaer-Jensen, C. et al. Single-copy insertion of transgenes in *Caenorhabditis elegans*. *Nat*  
557 *Genet* 40, 1375-83 (2008).  
558 25. Chen, X. et al. Dual sgRNA-directed gene knockout using CRISPR/Cas9 technology in  
559 *Caenorhabditis elegans*. *Sci Rep* 4, 7581 (2014).  
560 26. Minasaki, R. & Streit, A. MEL-47, a novel protein required for early cell divisions in the  
561 nematode *Caenorhabditis elegans*. *Mol Genet Genomics* 277, 315-28 (2007).  
562 27. Sugiyama, T. et al. Enhancer of Rudimentary Cooperates with Conserved RNA-Processing  
563 Factors to Promote Meiotic mRNA Decay and Facultative Heterochromatin Assembly. *Mol*  
564 *Cell* 61, 747-759 (2016).  
565 28. Weng, M.T. et al. Evolutionarily conserved protein ERH controls CENP-E mRNA splicing and  
566 is required for the survival of KRAS mutant cancer cells. *Proc Natl Acad Sci U S A* 109,  
567 E3659-67 (2012).  
568 29. Kavanaugh, G. et al. Enhancer of Rudimentary Homolog Affects the Replication Stress  
569 Response through Regulation of RNA Processing. *Mol Cell Biol* 35, 2979-90 (2015).  
570 30. Wan, G. et al. Spatiotemporal regulation of liquid-like condensates in epigenetic  
571 inheritance. *Nature* 557, 679-683 (2018).  
572 31. Van Treeck, B. & Parker, R. Emerging Roles for Intermolecular RNA-RNA Interactions in RNP  
573 Assemblies. *Cell* 174, 791-802 (2018).  
574 32. Feng, G. et al. Hippo kinases maintain polarity during directional cell migration in  
575 *Caenorhabditis elegans*. *EMBO J* 36, 334-345 (2017).  
576 33. Timmons, L., Court, D.L. & Fire, A. Ingestion of bacterially expressed dsRNAs can produce  
577 specific and potent genetic interference in *Caenorhabditis elegans*. *Gene* 263, 103-12  
578 (2001).  
579  
580  
581

## 582 **Figure legends**

### 583 **Fig. 1. *tofu-6* is required for 21U-RNA biogenesis and chromosome segregation.**

584 (A) Images of TOFU-6::GFP and P-granule marker mRuby::PGL-1 in germ cells. (B)  
585 Schematic of four alleles of *tofu-6*. (C) Normalized 21U-RNA reads in indicated  
586 animals at late young adult stage. Indicated mutant animals were isolated from  
587 balancers. Reads were normalized to total RNA reads. (D) Bar diagram displaying  
588 brood size of indicated worms. Worms were grown at 20°C. (E) Images of GFP::H2B  
589 at meta-anaphase of two-cells stage embryos in indicated worms. (F) Images of  
590 GFP::H2B in indicated later stage embryos.

### 592 **Fig. 2. Identification of TOFU-6 binding proteins by functional proteomics.** (A)

593 Summary of IP-MS followed by feeding RNAi experiments of TOFU-6::GFP. (B)  
594 Images of TOFU-6::GFP and P-granule marker mRuby::PGL-1 after RNAi targeting  
595 *pid-1* and *pics-1*. (C) Images of TOFU-6::GFP in indicated animals. (D) Images of  
596 TOFU-6::GFP after RNAi targeting *tost-1* and *erh-2*. (E) Western blotting of  
597 TOFU-6::GFP after RNAi targeting *tost-1* and *erh-2*.

### 599 **Fig. 3. TOFU-6, PID-1 and PICS-1 are required for 21U-RNA maturation.** (A)

600 Normalized 21U-RNA counts in *N2*, *pid-1(ust64)* and *pics-1(tm2417)* animals at late  
601 young adult stage. *pics-1(tm2417)* worms were isolated from balancers. Reads were  
602 normalized to total RNA reads. (B) Relative coverage of individual bases of  
603 21U-RNA loci by reads from indicated animals. The annotated 5' ends of 21U-RNA  
604 loci are at position 0. (C, D) Images of PID-1::GFP (C) and PICS-1::GFP (D) and  
605 P-granule marker mRuby::PGL-1 in germ cells. (E, F) Images of PID-1::GFP (E) and  
606 PICS-1::GFP (F) and histone marker mCherry::H2B after RNAi targeting *tofu-6*.

### 608 **Fig. 4. TOFU-6, PICS-1, ERH-2, PID-1 and TOST-1 interact with each other**

609 **both *in vitro* and *in vivo*.** (A, B) Images of TOST-1::GFP (A) and ERH-2::GFP (B)  
610 and P-granule marker mRuby::PGL-1 in germ cells. (C, D, E, F) Western blotting of  
611 pulling down samples to assay protein-protein interactions between TOFU-6, PICS-1,



612 ERH-2, PID-1 and TOST-1 *in vitro*. (G) Summary of the protein-protein interaction of  
613 TOFU-6, PICS-1, ERH-2, PID-1 and TOST-1 both *in vitro* and *in vivo*. Red lines  
614 indicate interactions *in vitro*. Blue arrows indicate interaction *in vivo*.

615

616 **Fig. 5. TOFU-6, PICS-1, ERH-2 and TOST-1 are required for chromosome**  
617 **segregation and cell division.** (A) Images of GFP::H2B at meta-anaphase stage after  
618 RNAi targeting indicated genes in embryos. (B) Diagram displaying percentage of  
619 abnormal chromosome segregation. (C) Images of GFP::H2B in late embryos after  
620 RNAi targeting indicated genes.

621

622 **Fig. 6. TOFU-6, PICS-1, ERH-2 and TOST-1 accumulate in nucleus during cell**  
623 **division.** (A, B) Images of TOFU-6/PICS-1/ERH-2/TOST-1::GFP in early embryos.  
624 Diagram displaying percentage of TOFU-6/PICS-1/ERH-2/TOST-1::GFP  
625 accumulating in nucleus in two-cell-embryos (A) and four-cell-embryos (B). (C)  
626 Images of TOFU-6/PICS-1/ERH-2/TOST-1::GFP in two-cell-embryos after RNAi  
627 targeting indicated genes. Diagram displaying percentage of  
628 TOFU-6/PICS-1/ERH-2/TOST-1::GFP accumulating in nucleus after RNAi targeting  
629 indicated genes.

630

631 **Fig 7. Identification of IFE-3 as an additional factor interacting with TOFU-6.** (A)  
632 Western blotting of pull down samples to assay protein-protein interactions between  
633 IFE-3 and TOFU-6 *in vitro*. (B) Images of IFE-3 in germline cells. (C) A working  
634 model of the PICS complex in germline and embryos.

635

636

637 **Supplementary figure legends**

638

639 **Fig. S1. Construction of TOFU transgenes.** (A) Images of TOFU-1::GFP and  
640 TOFU-2::GFP in cut gonad. (B) Images of TOFU-6::GFP, GFP::PRG-1 and  
641 PGL-1::GFP in cut gonad. (C) Images of GFP::PRG-1 and the P-granule marker

642 mRuby::PGL-1 in germline cells. (D) Bar diagram displaying brood size of indicated  
643 animals. Worms were grown at 20°C.

644

645 **Fig. S2. TOFU-6 is required for 21U-RNA biogenesis.** (A) Scatter plot comparing  
646 21U-RNA cloning frequencies between wild type and *tofu-6* mutant. (B) Images of  
647 GFP::PRG-1 in indicated animals (top) and the relative GFP intensities were  
648 measured by ImageJ (bottom), \*\*\*  $p < 0.01$ .

649

650 **Fig. S3. PID-1 and PICS-1 are required for the granule formation of TOFU-6.** (A)  
651 Schematic of *pid-1* and *pics-1* alleles. (B) Images of TOFU-6::GFP in mitosis and  
652 meiosis regions in indicated animals.

653

654 **Fig. S4. PID-1 and PICS-1 are required for 21U-RNA biogenesis.** (A, B) Scatter  
655 plot comparing 21U-RNA cloning frequencies between wild type and *pid-1(ust64)* (A)  
656 and *pics-1(tm2417)* (B) mutant worms. (C) Images of PID-1::GFP in cut gonad. (D)  
657 Images of PICS-1::GFP in cut gonad. (E) Bar diagram displaying brood size of  
658 indicated animals. Worms were grown at 20°C.

659

660 **Fig. S5. PID-1 is required for the granule formation of PICS-1.** (A) Images of  
661 PICS-1::GFP after RNAi targeting indicated genes. (B) Western blotting of  
662 PICS-1::GFP after RNAi targeting indicated genes. (C) Images of PICS-1::GFP in  
663 mitosis and meiosis regions in indicated animals. (D) Images of  
664 PICS-1::GFP;*tofu-6(ust94)* after RNAi targeting *pid-1*.

665

666 **Fig. S6. Genetic requirements of the subcellular localization of TOST-1 and**  
667 **ERH-2.** (A, B) Images of TOST-1::GFP (A) and ERH-2::GFP (B) in cut gonad. (C)  
668 Images of ERH-2::GFP after RNAi targeting *tost-1*. (D) Western blotting of  
669 ERH-2::GFP after RNAi targeting *tost-1*. (E) Images of TOST-1::GFP in cut gonad  
670 after RNAi targeting indicated genes. (F) Images of ERH-2::GFP after RNAi targeting  
671 indicated genes.

672

673 **Fig. S7. Summary of IP-MS results.** Top ten hits of TOFU-6, PICS-1, TOST-1 and  
674 ERH-2 are listed, respectively.

675

676 **Fig. S8. TOFU-6, PICS-1, ERH-2 and TOST-1 can accumulate in the nucleus.** (A,  
677 B) Images of TOFU-6::GFP, PICS-1::GFP, ERH-2::GFP and TOST-1::GFP in  
678 embryos (A) and in oocyte (B) after RNAi targeting indicated genes.

679

680

681 **Table S1:** IP-MS results of TOFU-6, TOST-1, PICS-1 and ERH-2.

682

683 **Table S2:** Strains used in the work.

684

685 **Table S3.** Primers used for transgene construction and sgRNA-mediated gene editing.

686

A

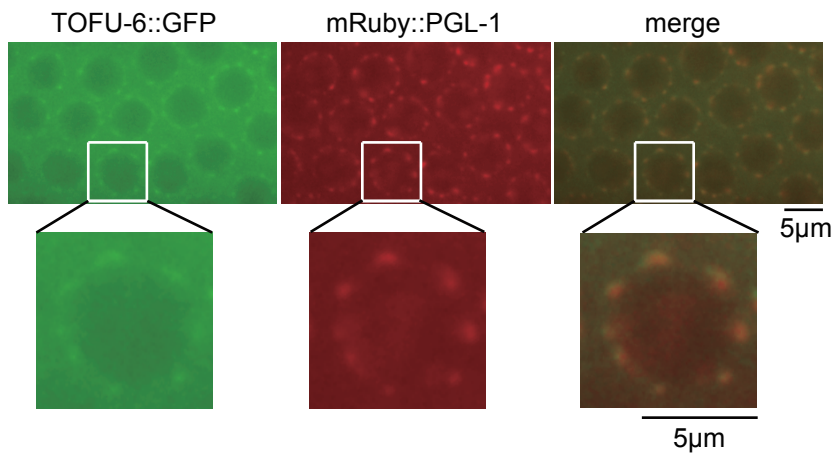

B

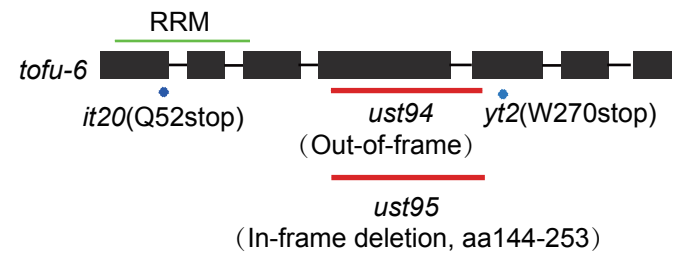

C

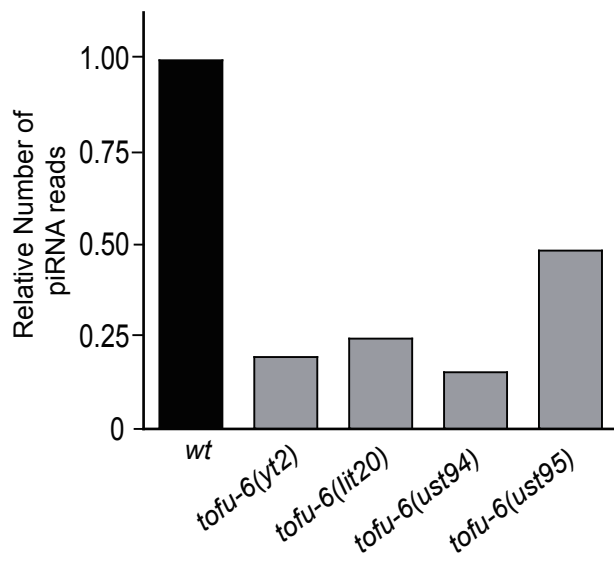

D

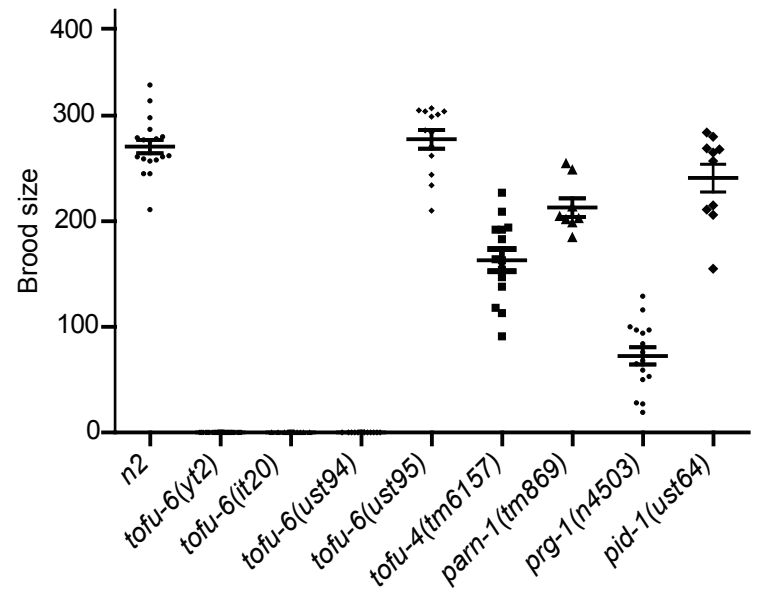

E

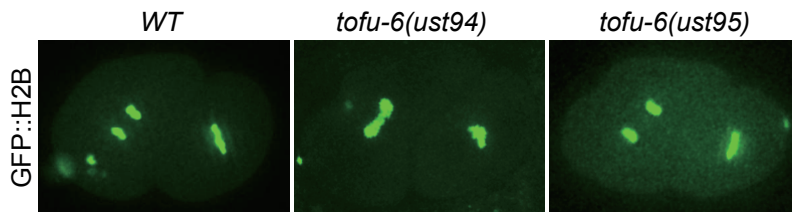

F

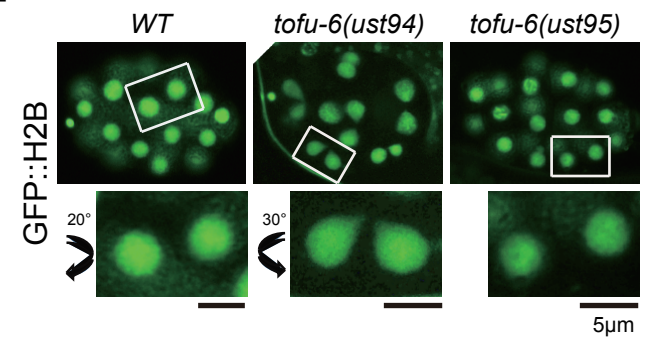

Figure 1

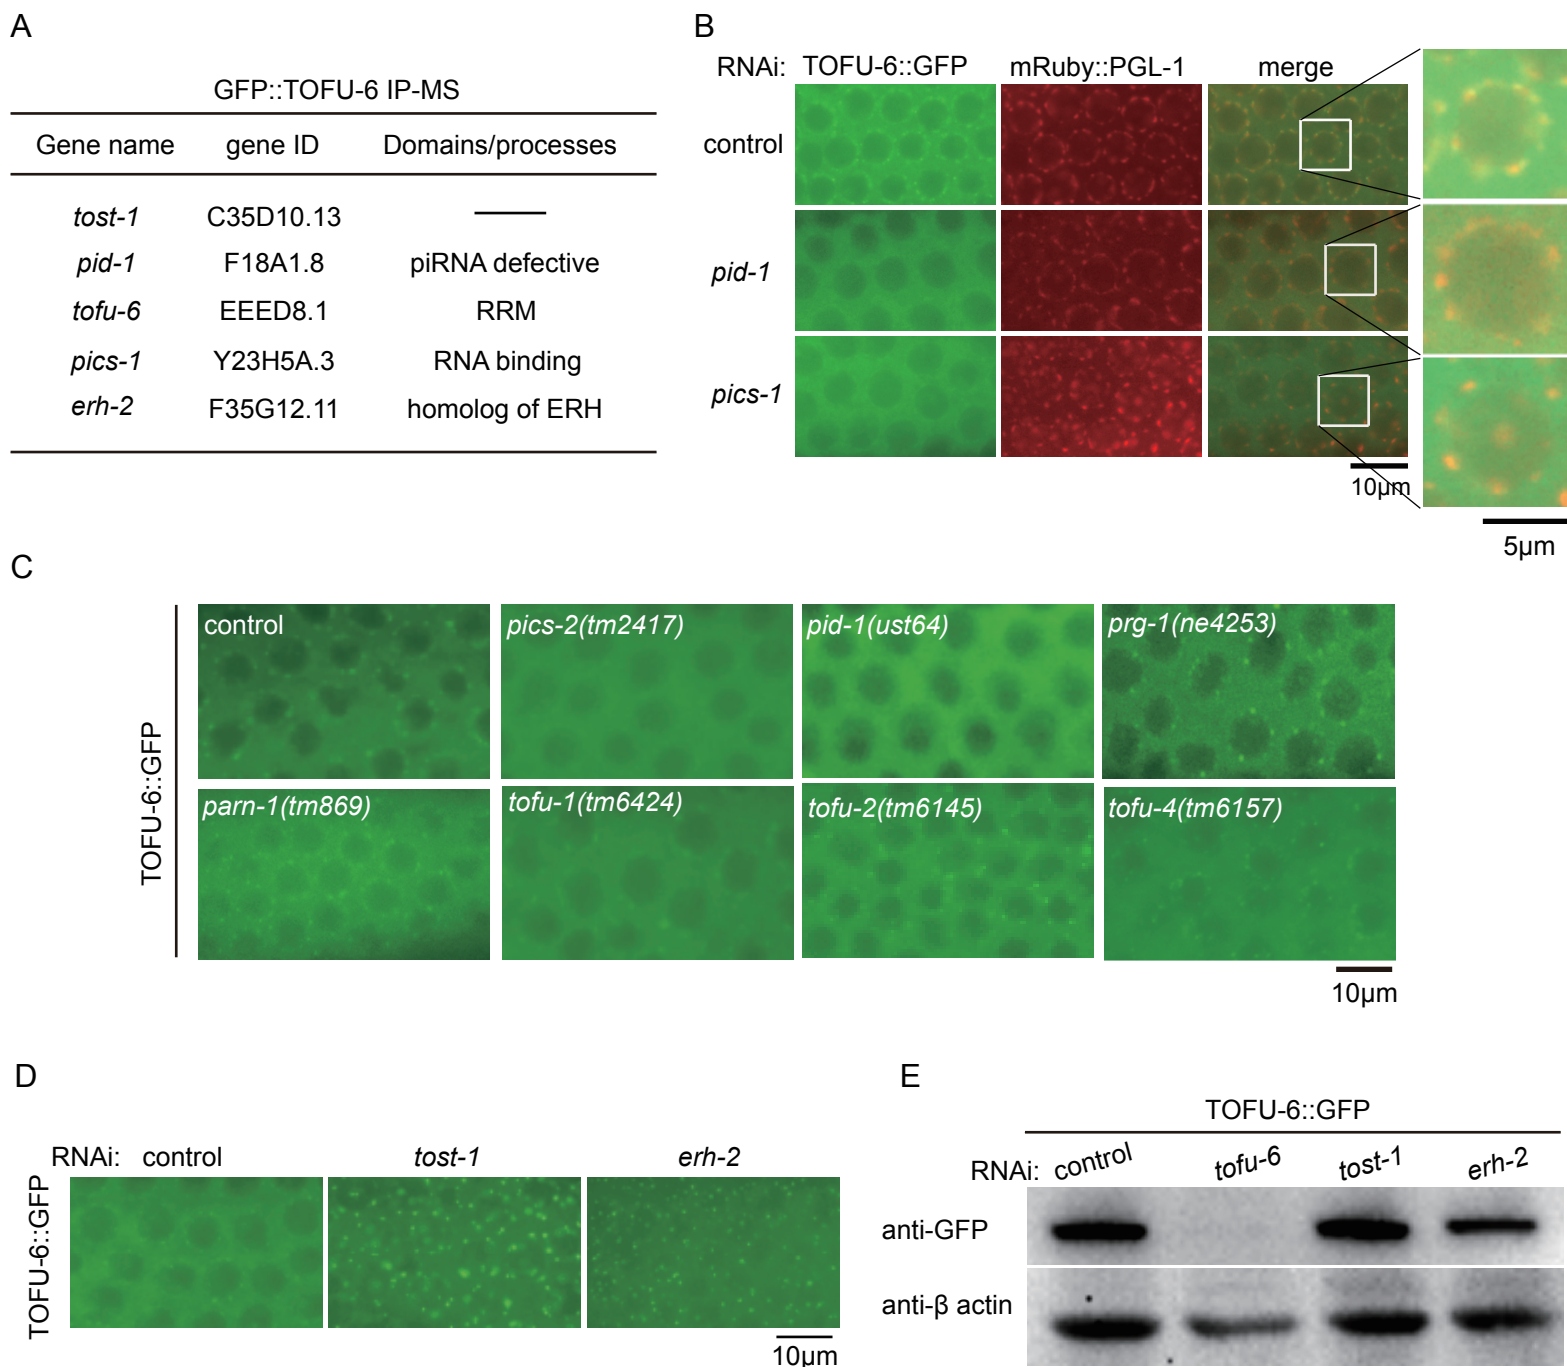

Figure 2

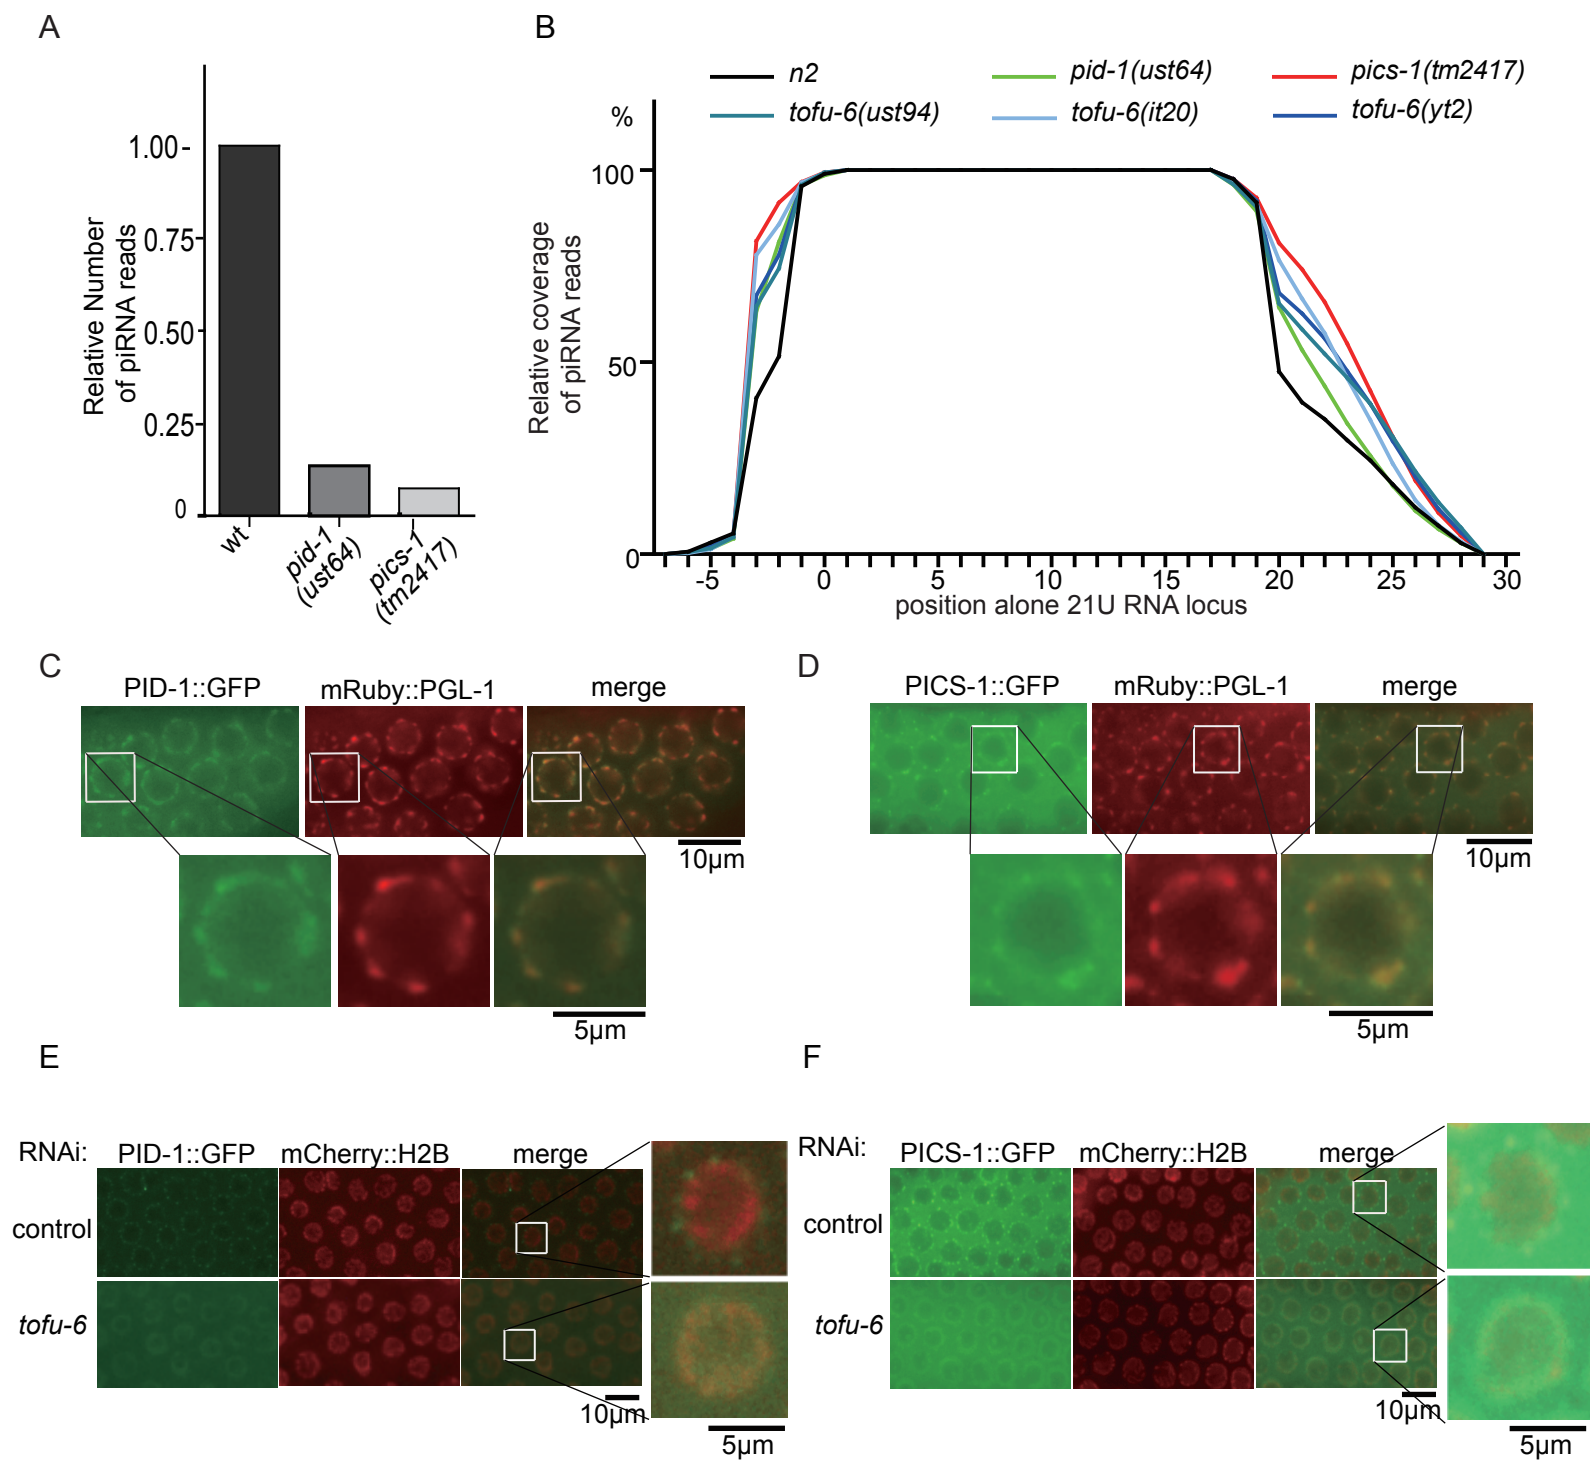

Figure 3



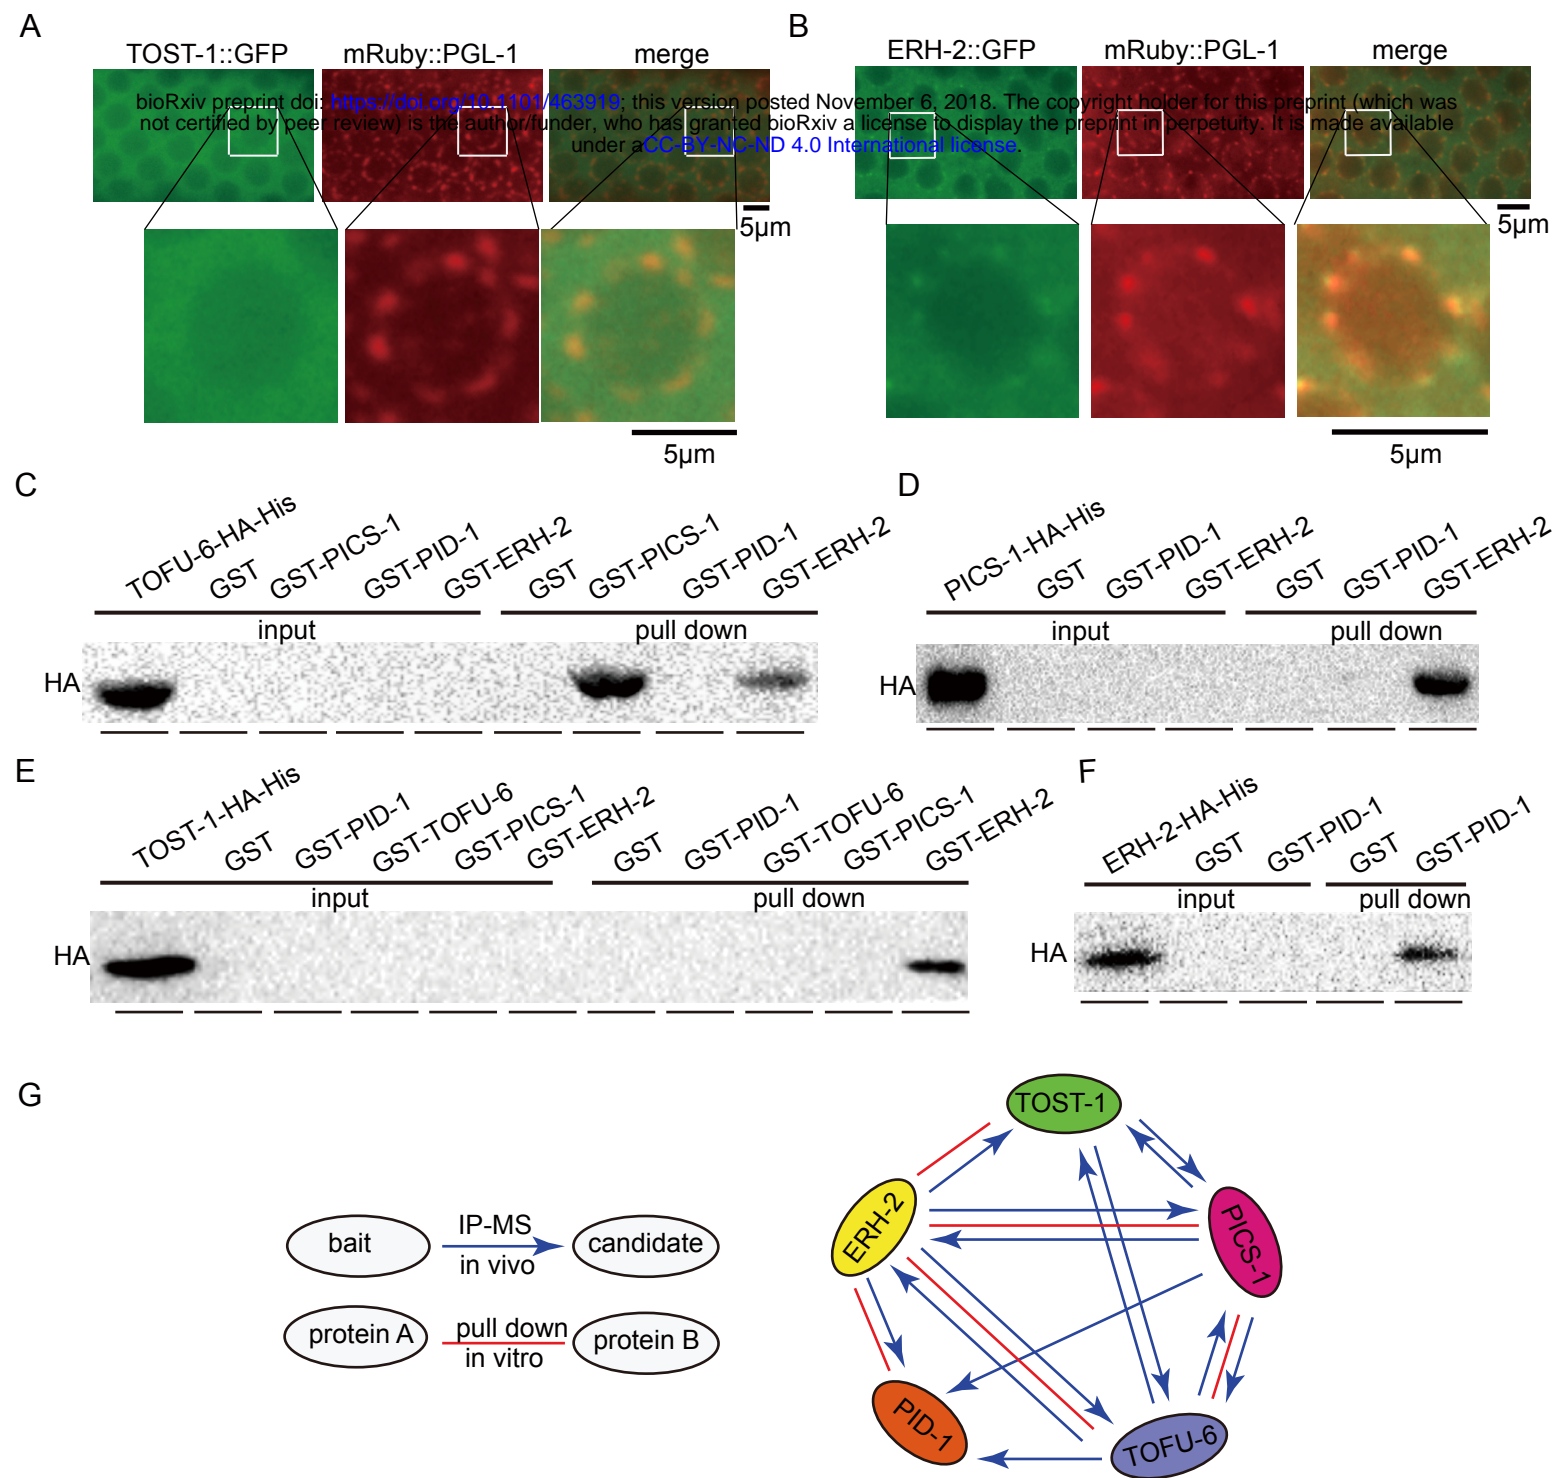

Figure 4

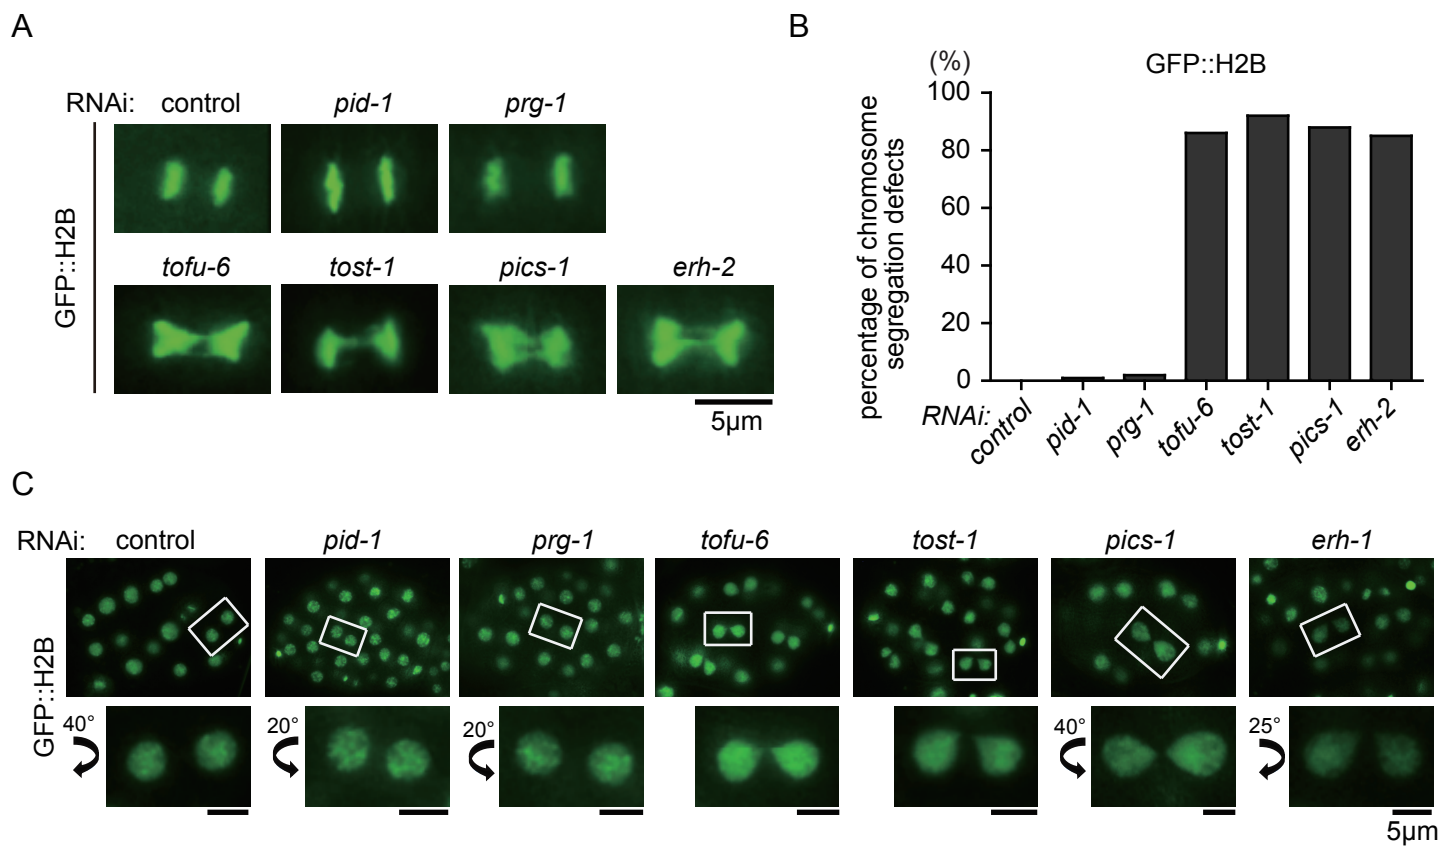

Figure 5



A

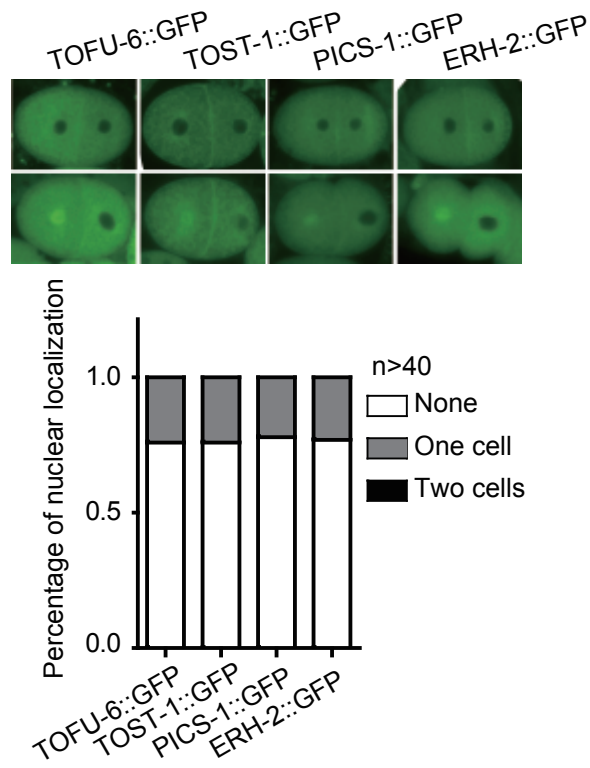

B

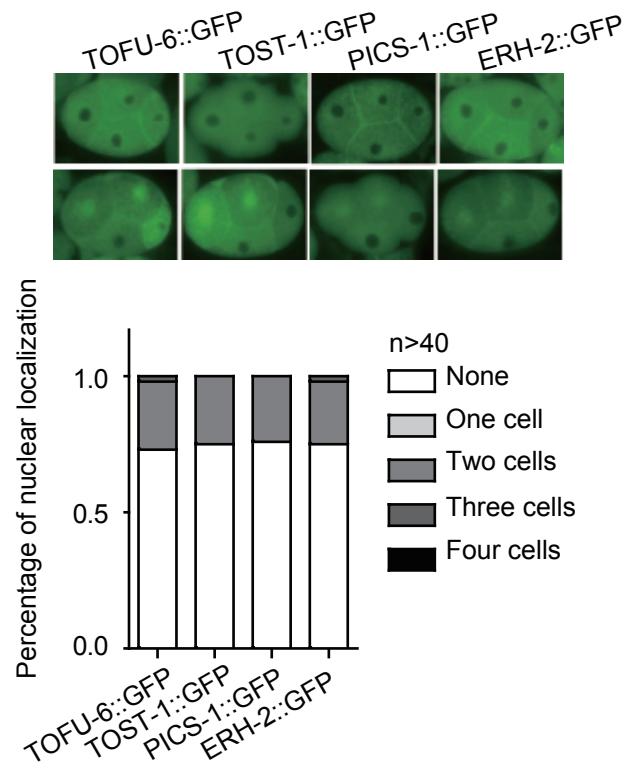

C

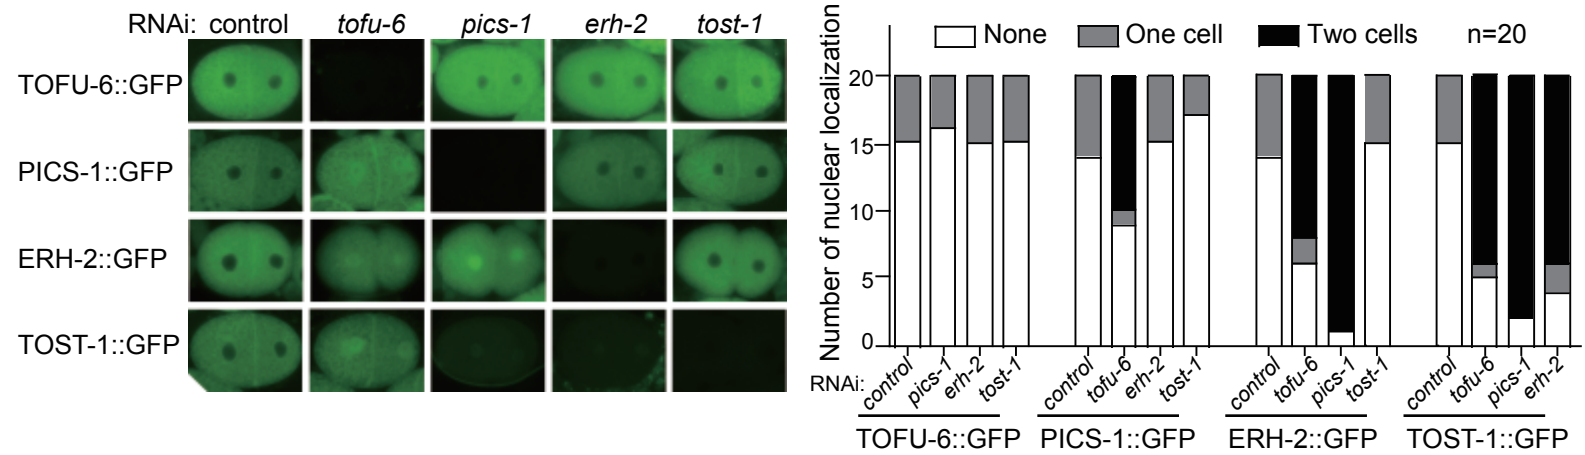

Figure 6

A

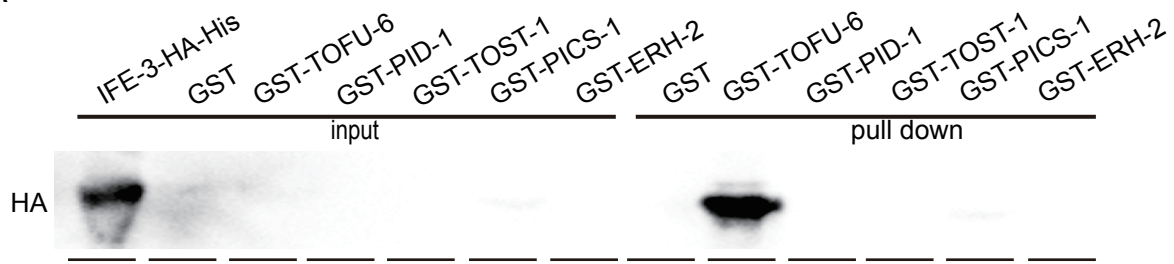

B

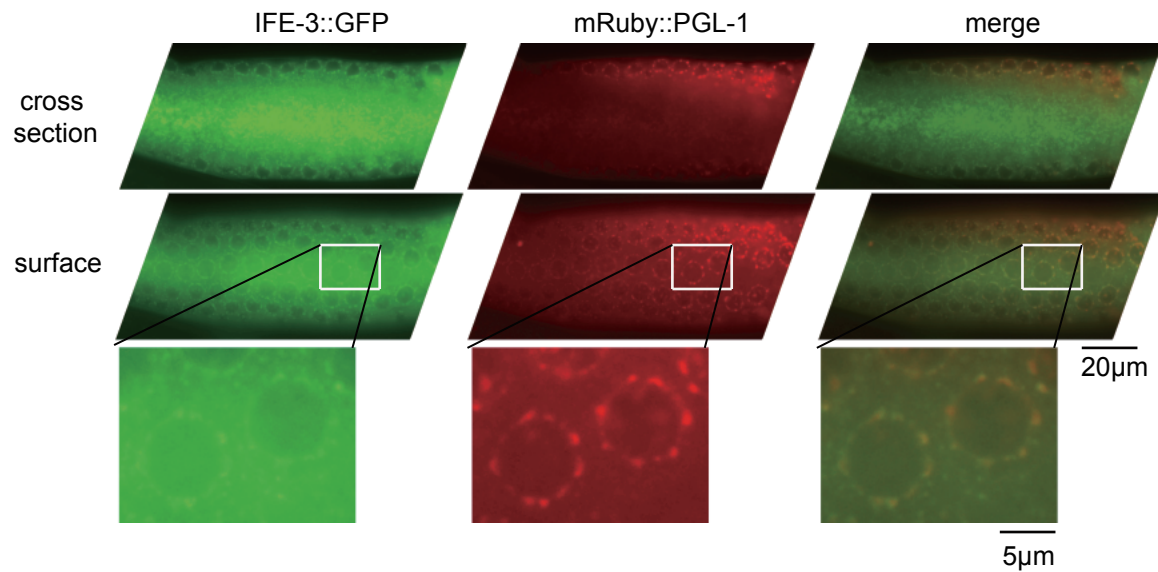

C

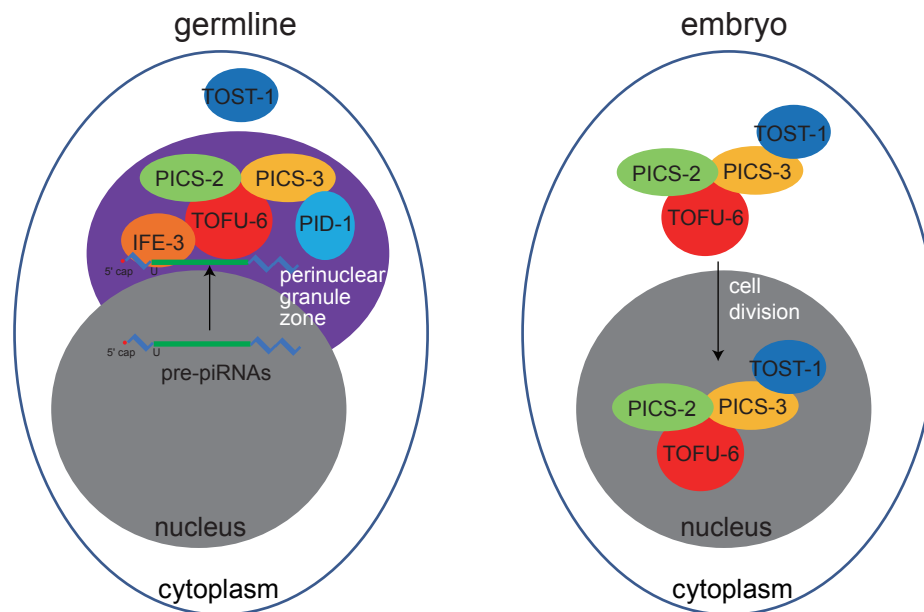

Source: https://www.biorxiv.org/content/10.1101/463919v1.full.pdf
